# Supplementary material
Source: publisher figshare collection journal article supplement (https://geolsoc.figshare.com/ndownloader/files/26447100)
Supplement: Supplementary file 1 [file 26447100]

## Sheet: Supplementary Table 1
Supplementary Table 1. Summary of the textural and compositional features of the ultramafic xenoliths from northern Victoria Land. Hz = harzburgite; Lh = lherzolite; Weh = wehrlite; Wb = websterite; Dn = dunite; Opxte = orthopyroxenite; Cpxte = clinopyroxenite; Hb = hornblendite. (a) = contains amphibole. Mineral phase abbreviatons: Ol = olivine; Opx = orthopyroxene; Cpx = clinopyroxene; Sp = spi…
Locality	Sample	Rock type		Texture		Modal abundance										References
						Ol	Opx	Cpx	Sp	Amph	Phlog	Glass/Reactions*	Plag	Tot
Greene Point	GP1	Hz		Protogranular		79.2	18	2.4	0.4	0	0	0	0	100		This study
Greene Point	GP2	Hz		Protogranular		72	20	2.3	1.2	0	0	4.5	0	100		This study
Greene Point	GP3	Hz		Protogranular		71.8	18	0.2	0	0	0	10	0	100		This study
Greene Point	GP5	Lh		Protogranular		52.3	40	7	0.7	0	0	traces	0	100		This study
Greene Point	GP6	Lh		Protogranular		69	23	7.2	0.8	0	0	traces	0	100		This study
Greene Point	GP8	Lh		Protogranular		66.6	23.5	9.5	0.4	0	0	traces	0	100		This study
Greene Point	GP9	Lh		Protogranular		65.9	17	15	2.1	0	0	traces	0	100		Pelorosso et al. (2016)
Greene Point	GP13	Lh		Protogranular		55.9	32	8.8	3.3	0	0	traces	0	100		Pelorosso et al. (2016)
Greene Point	GP15	Hz		Protogranular		71.6	22	3.4	1	0	0	2	0	100		This study
Greene Point	GP20	Lh		Protogranular		69.2	20	9	1.8	0	0	0	0	100		Melchiorre et al. (2011)
Greene Point	GP23	Hz		Protogranular		66	28	4	2	0	0	0	0	100		Bonadiman et al. (2009); Melchiorre et al. (2011); Pelorosso et al. (2016)
Greene Point	GP25	Lh		Protogranular		61	27	11	1	0	0	traces	0	100		Pelorosso et al. (2016)
Greene Point	GP28	Lh		Protogranular		67.5	18	13	1.5	0	0	traces	0	100		Pelorosso et al. (2016)
Greene Point	GP29	Lh		Protogranular		51	38	7.6	3.4	0	0	traces	0	100		This study
Greene Point	GP30	Lh		Protogranular		62.6	25	10	2.4	0	0	0	0	100		Bonadiman et al. (2009); Pelorosso et al. (2016)
Greene Point	GP36	Lh		Protogranular		68	24	7	1	0	0	0	0	100		This study
Greene Point	GP38	Lh		Protogranular		72.7	18.5	8.7	0.05	0	0	traces	0	99.95		Melchiorre et al. (2011); Correale et al. (2019)
Greene Point	GP41	Lh		Protogranular		43.7	41	11.5	3.8	0	0	traces	0	100		Melchiorre et al. (2011); Correale et al. (2019)
Greene Point	GP42	Hz		Protogranular		77.9	20.3	1.7	0.1	0	0	traces	0	100		Correale et al. (2019)
Greene Point	GP45	Hz		Protogranular		56.4	42.5	0.9	0.2	0	0	traces	0	100		This study
Greene Point	GP46	Hz		Protogranular		56.3	41.6	1.4	0.7	0	0	traces	0	100		This study
Greene Point	GP54	Hz		Protogranular		57	38	4.8	0.2	0	0	traces	0	100		This study
Greene Point	GP56	Hz		Protogranular		50	47.5	1.8	0.7	0	0	traces	0	100		Correale et al. (2019)
Greene Point	GP60	Lh		Protogranular		78.7	15	5	1.3	0	0	traces	0	100		This study
Greene Point	GP61	Hz		Protogranular		80	14	2	4	0	0	traces	0	100		Melchiorre et al. (2011)
Greene Point	GP71	Hz		Protogranular		76	20.9	2.8	0.3	0	0	traces	0	100		This study
Greene Point	GP72	Lh		Protogranular		64.5	24	10	1.5	0	0	traces	0	100		Melchiorre et al. (2011)
Greene Point	GP73	Lh		Protogranular		63	23.2	11.5	2.3	0	0	traces	0	100		This study
Greene Point	GP74	Lh		Protogranular		54.5	26	17.5	2	0	0	traces	0	100		This study
Greene Point	GP77	Lh		Protogranular		64	22	10.4	3.6	0	0	traces	0	100		This study
Greene Point	GP78	Hz		Protogranular		62.7	35	2.3	traces	0	0	traces	0	100		Bonadiman et al. (2009); Pelorosso et al. (2016)
Greene Point	GP81	Hz		Protogranular		82.6	15	1.8	0.6	0	0	traces	0	100		Bonadiman et al. (2009); Pelorosso et al. (2016)
Greene Point	GP84	Lh		Protogranular		66.8	20	11	2.2	0	0	traces	0	100		Bonadiman et al. (2009); Melchiorre et al. (2011); Pelorosso et al. (2016)
Greene Point	GP94	Lh		Protogranular		64	23.1	12	0.9	0	0	traces	0	100		This study
Greene Point	GP101	Lh		Protogranular		67	26.1	6	0.9	0	0	traces	0	100		This study
Greene Point	GP110	Hz		Protogranular		54.5	45	0.5	traces	0	0	traces	0	100		This study
Greene Point	CD301	Hz		Protogranular		73	20	2.3	0.7	0	0	4	0	100		This study
Greene Point	CD303	Hz		Protogranular		77.3	20	1.4	0.3	0	0	1	0	100		This study
Greene Point	CD305	Hz		Protogranular		79.7	17.5	2	0.8	0	0	traces	0	100		Melchiorre et al. (2011); Pelorosso et al. (2016)
Greene Point	GP1P	Hz-Lh		Protogranular-porphyroclastic		70.4	23.3	5.1	1.2	0	0	0	0	100		Perinelli et al. (1998); Perinelli et al. (2006)
Greene Point	GP5P	Hz		Protogranular		74.5	19.4	4.8	1.3	0	0	traces	0	100		Perinelli et al. (1998); Perinelli et al. (2006)
Greene Point	GP6P	Hz		Protogranular		76.5	18.2	4.2	1.1	0	0	traces	0	100		Perinelli et al. (1998); Perinelli et al. (2006); Perinelli et al. (2012)
Greene Point	GP10P	Hz		Protogranular		71.4	19.9	7.4	1.3	0	0	traces	0	100		Perinelli et al. (2006)
Greene Point	GP14P	Lh		Protogranular		66.2	20.5	11.9	1.4	0	0	traces	0	100		Perinelli et al. (2006)
Greene Point	GP15P	Hz		Protogranular		74.8	23.3	0.9	1	0	0	0	0	100		Perinelli et al. (1998)
Greene Point	GP16P	Hz		Protogranular-porphyroclastic		72.9	21.7	4.3	1.1	0	0	0	0	100		Perinelli et al. (1998); Perinelli et al. (2006)
Greene Point	GP17P	Hz		Protogranular-porphyroclastic		71.9	23.7	4	0.4	0	0	0	0	100		Perinelli et al. (1998)
Greene Point	GP20P	Lh		Protogranular		77.3	16.3	6.1	0.3	0	0	0	0	100		Perinelli et al. (1998); Perinelli et al. (2006)
Greene Point	GP21P	Hz		Protogranular-porphyroclastic		85	14.4	0	0.6	0	0	0	0	100		Perinelli et al. (1998); Perinelli et al. (2006)
Greene Point	GP22P	Hz		Protogranular		77.8	17.3	3.8	1.1	0	0	traces	0	100		Perinelli et al. (1998); ; Perinelli et al. (2006); Perinelli et al. (2012)
Greene Point	GP25P	Hz		Protogranular		82.2	16	1	0.8	0	0	traces	0	100		Perinelli et al. (1998); Perinelli et al. (2006)
Greene Point	GP28P	Lh		Protogranular		70.1	22	7	0.9	0	0	0	0	100		Perinelli et al. (2006)
Greene Point	GP29P	Hz		Protogranular		72.8	22.7	3.7	0.8	0	0	0	0	100		Perinelli et al. (2006)
Greene Point	GP31P	Hz		Protogranular		78.1	17.8	3.3	0.8	0	0	0	0	100		Perinelli et al. (2006); Perinelli et al. (2012)
Greene Point	GP34P	Lh		Protogranular		70.5	21.8	6.7	1	0	0	0	0	100		Perinelli et al. (2006)
Greene Point	GP36P	Lh		Protogranular		69.2	21.5	7.9	1.4	0	0	0	0	100		Perinelli et al. (2006)
Greene Point	GP39P	Hz		Porphyroclastic		77.1	19.2	2.2	1.5	0	0	0	0	100		Perinelli et al. (2006)
Greene Point	GP40P	Lh		Protogranular		67.1	21.1	10.7	1.1	0	0	0	0	100		Perinelli et al. (2006); Perinelli et al. (2012)
Greene Point	GP42P	Lh		Protogranular		66.7	20.3	11.5	1.5	0	0	0	0	100		Perinelli et al. (2006); Perinelli et al. (2012)
Greene Point	GP44P	Hz		Porphyroclastic		74.7	21.8	1.8	1.7	0	0	0	0	100		Perinelli et al. (2006)
Greene Point	GP49P	Hz		Protogranular		73.1	21.8	4.4	0.7	0	0	0	0	100		Perinelli et al. (2006)
Willow Nunatak Beach	142A	Lh		Porphyroclastic		62.2	26	10	1.8	0	0	0	0	100		Beccaluva et al. (1991)
Willow Nunatak Beach	142B	Lh		Porphyroclastic		52.5	30	13	4.5	0	0	0	0	100		Beccaluva et al. (1991)
Willow Nunatak Beach	142C	Hz		Porphyroclastic		71	24	3	2	0	0	0	0	100		Beccaluva et al. (1991)
Willow Nunatak Beach	142D	Hz		Porphyroclastic		74	23	3	traces	0	0	0	0	100		Beccaluva et al. (1991)
Willow Nunatak Beach	142E	Hz		Porphyroclastic		78	18	4	traces	0	0	0	0	100		Beccaluva et al. (1991)
Willow Nunatak Beach	142F	Hz		Porphyroclastic		73.8	22	3.8	0.4	0	0	0	0	100		Beccaluva et al. (1991)
Willow Nunatak Beach	143A	Lh		Protogranular-porphyroclastic		69	23	7	1	0	0	0	0	100		Beccaluva et al. (1991)
Willow Nunatak Beach	143B	Lh		Protogranular-porphyroclastic		66	26	5.3	2.7	0	0	traces	0	100		Beccaluva et al. (1991)
Willow Nunatak Beach	278A	Hz		Protogranular-porphyroclastic		82.4	14	0.4	3.2	0	0	traces	0	100		Beccaluva et al. (1991)
Willow Nunatak Beach	278B	Hz		Protogranular-porphyroclastic		76.5	17	4.5	2	0	0	traces	0	100		Beccaluva et al. (1991)
Willow Nunatak Beach	278C	Lh(a)		Protogranular-porphyroclastic		53.4	21	22	2	0.8	0.8	0	0	100		Beccaluva et al. (1991)
Willow Nunatak Beach	278D	Lh(a)		Protogranular-porphyroclastic		72	13	11.5	0.7	0.8	2	traces	0	100		Beccaluva et al. (1991)
Willow Nunatak Beach	278E	Lh		Protogranular		70	20	9	1	0	0	0	0	100		Beccaluva et al. (1991)
Willow Nunatak	265A	Ol-Wb		Meso-cumulitic		12	47	40	1	0	0	traces	0	100		Beccaluva et al. (1991)
Willow Nunatak	265B	Lh		Protogranular-porphyroclastic		64.8	27	7	1.2	0	0	traces	0	100		Beccaluva et al. (1991)
Willow Nunatak	265C	Lh		Protogranular-porphyroclastic		56.8	27	15	1.2	0	0	traces	0	100		Beccaluva et al. (1991)
Edmondson Point	231	Weh		Porphyroclastic-mosaic equigranular		75.5	0	23	1.5	0	0	traces	0	100		Beccaluva et al. (1991)
Edmondson Point	231A	Hz		II generation Protogranular		77.5	16	1.5	5	0	0	0	0	100		Beccaluva et al. (1991)
Edmondson Point	231B	Hz		II generation Protogranular		77	15	1.5	6.5	0	0	traces	0	100		Beccaluva et al. (1991)
Baker Rocks	154B	Lh(a)		Porphyroclastic		58.2	28	8	1.8	4	0	traces	0	100		Beccaluva et al. (1991); Coltorti et al. (2004)
Baker Rocks	154C	Lh(a)		Protogranular		68	15	8.5	1	7.5	0	traces	0	100		Beccaluva et al. (1991); Coltorti et al. (2004)
Baker Rocks	154D	Hz		Porphyroclastic		63	30.7	4.3	2	0	0	traces	0	100		Beccaluva et al. (1991); Coltorti et al. (2004)
Baker Rocks	154E	Lh		Protogranular-porphyroclastic		72	20	6	2	0	0	traces	0	100		Beccaluva et al. (1991); Coltorti et al. (2004)
Baker Rocks	154F	Lh(a)		Porphyroclastic		65	23	5.5	2.5	4	0	traces	0	100		Beccaluva et al. (1991); Coltorti et al. (2004); Bonadiman et al. (2014)
Baker Rocks	154G Ol-Wb	Ol-Wb(a)		Mosaic equigranular		26	9	45	4.7	15.3	0	traces	0	100		Beccaluva et al. (1991); Coltorti et al. (2004); Bonadiman et al. (2014)
Baker Rocks	154G Hb	Hb		Ad-cumulitic		0	0	0	0	100	0	traces	0	100		Beccaluva et al. (1991); Coltorti et al. (2004); Bonadiman et al. (2014)
Baker Rocks	154H Lh	Lh(a)		Protogranular		77	14	8	1	traces	0	traces	0	100		Beccaluva et al. (1991); Coltorti et al. (2004); Bonadiman et al. (2014)
Baker Rocks	154H Hb	Hb		Ad-cumulitic		2	0	0	0	98	0	traces	0	100		Beccaluva et al. (1991); Coltorti et al. (2004); Bonadiman et al. (2014)
Baker Rocks	159A	Lh		Porphyroclastic		63.2	20	16	0.8	0	0	traces	0	100		Beccaluva et al. (1991)
Baker Rocks	161A	Lh		Protogranular-porphyroclastic		59.6	34	6	0.4	0	0	traces	0	100		Beccaluva et al. (1991)
Baker Rocks	161B	Hz		II generation Protogranular		59	37	2.3	1.7	0	0	traces	0	100		Beccaluva et al. (1991)
Baker Rocks	BR1	Lh		Porphyroclastic		62	30	6	2	0	0	traces	0	100		Correale et al. (2019)
Baker Rocks	BR3	Lh		Porphyroclastic		55	24.8	19	1.2	0	0	traces	0	100		Correale et al. (2019)
Baker Rocks	BR4	Lh		Porphyroclastic		51	33.5	10	4.7	0	0	0.8	0	100		Correale et al. (2019)
Baker Rocks	BR5	Lh		Porphyroclastic		46.5	29	20	4.5	0	0	0	0	100		Correale et al. (2019)
Baker Rocks	BR29	Lh		Porphyroclastic		66.2	21	9	3.8	0	0	traces	0	100		Melchiorre et al. (2011); Correale et al. (2019)
Baker Rocks	BR34	Lh		Porphyroclastic		60.3	25	11	3.7	0	0	traces	0	100		This study
Baker Rocks	BR36	Lh		Porphyroclastic		63	21	12.2	3.8	0	0	traces	0	100		This study
Baker Rocks	BR38	Hz		Mosaic equigranular		78.5	19	1.5	1	0	0	traces	0	100		Correale et al. (2019)
Baker Rocks	BR42	Hz		Porphyroclastic		64.5	30	3.3	2.2	0	0	0	0	100		Melchiorre et al. (2011); Correale et al. (2019)
Baker Rocks	BR43	Hz		Protogranular		72.3	22	4.8	0.9	0	0	traces	0	100		Correale et al. (2019)
Baker Rocks	BR47	Ol-Wb		Porphyroclastic		38.3	43	16	1.7	0	traces	1	0	100		Melchiorre et al. (2011); Correale et al. (2019)
Baker Rocks	BR53 Hz	Hz		Porphyroclastic		77.5	18	2.3	2.2	0	0	traces	0	100		Correale et al. (2019)
Baker Rocks	BR53 Hb	Hb		Ad-cumulitic		0	0	0	0	100	0	traces	0	100		Correale et al. (2019)
Baker Rocks	BR55 Lh	Lh		Porphyroclastic		68	19	11	2	0	0	traces	0	100		Melchiorre et al. (2011); Correale et al. (2019)
Baker Rocks	BR55 Hb	Hb		Ad-cumulitic		0	0	0	0	100	0	traces	0	100		Melchiorre et al. (2011); Correale et al. (2019)
Baker Rocks	BR56	Lh(a)		Porphyroclastic		47.5	18	15	4.5	15	0	traces	0	100		Melchiorre et al. (2011); Bonadiman et al. (2014); Correale et al. (2019)
Baker Rocks	BR57 Lh	Lh		Porphyroclastic		78	13	8	1	0	0	traces	0	100		Bonadiman et al. (2014)
Baker Rocks	BR57 Ol-Cpxte	Ol-Cpxte(a)		Ad-cumulitic		10	0	20.4	0.6	68	0	1	0	100		This study
Baker Rocks	BR58	Lh		Protogranular		69.5	20	6	4.5	0	0	traces	0	100		This study
Baker Rocks	BR209	Lh		Protogranular		69.9	23.6	5.1	1.4	0	0	0	0	100		Perinelli et al. (1998)
Baker Rocks	BR210	Hz		Protogranular		81.1	15.5	2.4	1	0	0	0	0	100		Perinelli et al. (1998)
Baker Rocks	BR211	Hz		Protogranular-porphyroclastic		72.1	21.5	4.6	1.8	0	0	0	0	100		Perinelli et al. (1998)
Baker Rocks	BR212	Hz		Protogranular		87	11.7	1.1	0.2	0	0	0	0	100		Perinelli et al. (1998)
Baker Rocks	BR213	Lh		Protogranular		69.4	22.5	7.3	0.6	0	0	0.6	0	100.4		Perinelli et al. (2006)
Baker Rocks	BR213b	Hz		Protogranular		76.6	21.7	1.3	0	0	0	0.4	0	100		Perinelli et al. (1998)
Baker Rocks	BR214 Lh	Lh		Mosaic equigranular		68.4	24.3	6.7	0.6	0	0	0	0	100		Perinelli et al. (1998); Perinelli et al. (2006)
Baker Rocks	BR214 Weh	Weh		Meso-cumulitic		73.9	4.6	20.9	0	0	0	0.6	0	100		Perinelli et al. (1998); Perinelli et al. (2006)
Baker Rocks	BR215	Weh		Meso-cumulitic		56.1	3.6	37.2	0	0	0	3.1	0	100		Perinelli et al. (1998)
Baker Rocks	BR217	Weh		Meso-cumulitic		59.3	5	33.2	0	0	0	2.5	0	100		Perinelli et al. (1998)
Baker Rocks	BR218 Lh	Lh		Mosaic		71.8	19.1	8.9	0.2	0	0	0	0	100		Perinelli et al. (2006); Perinelli et al. (2012)
Baker Rocks	BR218 Hb	Hb		Ad-cumulitic		0	0	0	0	98.6	0	1.4	0	100		Perinelli et al. (2006); Perinelli et al. (2012)
Baker Rocks	BR219 Hz	Hz		Mosaic		80.7	15.5	3.6	0.2	0	0	0	0	100		Perinelli et al. (1998); Perinelli et al. (2006)
Baker Rocks	BR219 Weh	Weh		Meso-cumulitic		60.4	4.3	34	0.3	0	0	1	0	100		Perinelli et al. (1998); Perinelli et al. (2006)
Handler Ridge	HR1	Lh		Protogranular		67	21	10	2	0	0	0	0	100		Pelorosso et al. (2017); Correale et al. (2019)
Handler Ridge	HR2	Lh		Protogranular		72	17	8	3	0	0	traces	0	100		Pelorosso et al. (2017); Correale et al. (2019)
Handler Ridge	HR3	Lh		Protogranular		55	24	17	4	0	0	0	0	100		Pelorosso et al. (2017); Correale et al. (2019)
Handler Ridge	HR4	Lh		Protogranular		64	22	10	4	0	0	traces	0	100		Pelorosso et al. (2017)
Handler Ridge	HR5	Lh		Protogranular		47	32	18	3	0	0	0	0	100		Pelorosso et al. (2017)
Handler Ridge	HR6	Lh		Protogranular		66	26	6	2	0	0	traces	0	100		Pelorosso et al. (2017)
Handler Ridge	HR7	Weh		Meso-cumulitic		68	0	30	2	0	0	traces	0	100		Pelorosso et al. (2017)
Handler Ridge	HR9	Lh		Protogranular		65	18	13	4	0	0	0	0	100		Pelorosso et al. (2017)
Handler Ridge	HR10A	Lh		Protogranular; spongy cpx, round sp		70	11	16	3	0	0	traces	0	100		Pelorosso et al. (2017)
Handler Ridge	HR10	Lh		Protogranular; spongy cpx, round sp		70	8	20	2	0	0	0	0	100		Pelorosso et al. (2017)
Handler Ridge	HR11	Weh		Meso-cumulitic		81	0	16	3	0	0	traces	0	100		Pelorosso et al. (2017); Correale et al. (2019)
Handler Ridge	HR13	Lh		Protogranular		58.3	34	6	1.7	0	0	traces	0	100		This study
Harrow Peaks	HP121 Dn	Dn(a)		Mosaic equigranular		90.7	7	0.5	1	0.8	0	traces	0	100		Gentili et al. (2015); Pelorosso et al. (2019)
Harrow Peaks	HP121 Hb	Hb		Ad-cumulitic		0	0	0	0	100	0	traces	0	100		Gentili et al. (2015); Pelorosso et al. (2019)
Harrow Peaks	HP124	Dn(a)		Mosaic equigranular		89	5	0.7	1.2	4	0.1	traces	0	100		Gentili et al. (2015); Pelorosso et al. (2019)
Harrow Peaks	HP143 Dn	Dn(a)		Mosaic equigranular		81.5	0	1.5	17	0	0	traces	0	100		Gentili et al. (2015); Pelorosso et al. (2019)
Harrow Peaks	HP143 Cpxte	Cpxte		Ad-cumulitic		6	0.1	93.7	0.2	0	0	traces	0	100		Gentili et al. (2015); Pelorosso et al. (2019)
Harrow Peaks	HP144 Hz	Hz(a)		Mosaic equigranular		84.5	12	2.5	1	traces	0	traces	0	100		Pelorosso et al. (2019)
Harrow Peaks	HP144 Opxte	Opxte(a)		Ad-cumulitic		0	99.8	0	0	0.2	0	traces	0	100		Pelorosso et al. (2019)
Harrow Peaks	HP151	Lh		Mosaic equigranular		76	16	6	2	traces	0	traces	0	100		Pelorosso et al. (2019)
Harrow Peaks	HP163	Opxte		Meso-cumulitic		0.5	92.5	5	2	traces	0	traces	0	100		Pelorosso et al. (2019)
Harrow Peaks	HP164	Lh(a)		Protogranular		62	25	7	5	1	0	traces	0	100		Gentili et al. (2015); Pelorosso et al. (2019)
Harrow Peaks	HP166	Hz		Mosaic equigranular, medium-fine		63	32	4	1	traces	0	traces	0	100		Pelorosso et al. (2019)
Harrow Peaks	113A	Ol-Wb		Mosaic equigranular		9	68	21	2	0	0	0	0	100		This study
Harrow Peaks	113B	Lh		Protogranular		67	21	7	3.5	0	0	1.5	0	100		This study
Mount Overlord	OV1	Weh		Meso-cumulitic, pecilitic spinel		40	0	52	8	0	0	0	0	100		This study
Mount Overlord	OV2	Weh		Meso-cumulitic		51.8	0	48	0.2	0	0	traces	0	100		This study
Mount Overlord	OV3	Ol-Cpxte		Meso-cumulitic		38	0	61.8	0.2	0	0	traces	0	100		This study
Mount Overlord	OV4	Ol-Cpxte		Meso-cumulitic		32.2	0	67	0.8	0	0	traces	0	100		This study
Mount Overlord	OV5	Ol-Cpxte		Meso-cumulitic		26	0	72.9	0.1	1	0	traces	0	100		This study
Mount Overlord	189A Lh	Lh(a)		Porphyroclastic		75.5	8	10	5	1	0	0.5	0	100		Coltorti et al. (2004)
Mount Overlord	189A ol-Cpxte	Ol-Cpxte(a)		Meso-cumulitic, recryst		16	0	75	4	4	0	1	0	100		Coltorti et al. (2004)
Mount Overlord	189B	Weh		Meso-cumulitic, recryst		59.9	0	40	0.1	0	0	traces	0	100		This study
Mount Overlord	189C	Weh		Meso-cumulitic, recryst		61	0	37	2	0	0	0	0	100		This study
Mount Overlord	189E	Weh		Meso-cumulitic, recryst		54	0	43	3	0	0	traces	0	100		This study
Mount Overlord	OVP1	Hb		Ortho-Cumulitic		12	0	25	10	53	0	0	0	100		Perinelli et al. (2017)
Mount Overlord	OVP2	Hb		Ortho-Cumulitic		2	0	25	14	59	0	0	0	100		Perinelli et al. (2017)
Mount Overlord	OVP4	Weh(a)		Meso-cumulitic		65	0	25	6	4	0	0	0	100		Perinelli et al. (2017)
Mount Overlord	OVP7	Hb		Meso-cumulitic		15	0	25	3	57	0	0	0	100		Perinelli et al. (2017)
Mount Overlord	OVP18	Weh		Meso-cumulitic		65	0	33	2	0	0	0	0	100		Perinelli et al. (2017)
Mount Overlord	OVP19	Weh		Meso-cumulitic		69	0	30	1	0	0	traces	0	100		Perinelli et al. (2017)
Mount Overlord	OVP25	Ol-Cpxte(a)		Meso-cumulitic		20	traces	75	2	3	0	traces	0	100		Perinelli et al. (2017)
Mount Overlord	OVP27	Weh(a)		Meso-cumulitic		50	0	45	5	traces	0	traces	0	100		Perinelli et al. (2017)
Mount Overlord	OVP28	Weh		Meso-cumulitic		73	0	25	2	0	0	traces	0	100		Perinelli et al. (2017)
Mount Overlord	OVP30	Weh		Meso-cumulitic		70	0	30	traces	0	0	traces	0	100		Perinelli et al. (2017)
Mount Overlord	OVP32	Weh(a)		Meso-cumulitic		46	0	30	9	15	0	0	0	100		Perinelli et al. (2017)
Mount Overlord	OVP33	Weh(a)		Meso-cumulitic		48	0	49	2	traces	0	1	0	100		Perinelli et al. (2017)
Mount Overlord	OVP35	Ol-Cpxte(a)		Meso-cumulitic		46	0	51	2	1	0	traces	0	100		Perinelli et al. (2017)
Mount Overlord	OVP36	Ol-Cpxte		Meso-cumulitic		30	0	67	3	0	0	traces	0	100		Perinelli et al. (2017)
Mount Overlord	OVP37	Ol-Cpxte(a)		Meso-cumulitic		12	0	78	6	3	0	1	0	100		Perinelli et al. (2017)
Mount Overlord	OVP38	Ol-Cpxte(a)		Meso-cumulitic		7	0	80	5	8	0	0	0	100		Perinelli et al. (2017)
Mount Overlord	OVP39	Weh(a)		Meso-cumulitic		50	0	45	5	traces	0	traces	0	100		Perinelli et al. (2017)
Mount Overlord	OVP40	Ol-Cpxte(a)		Meso-cumulitic		7	0	78	12	3	0	traces	0	100		Perinelli et al. (2017)
Mount Overlord	OVP41	Weh		Meso-cumulitic		48	0	47	5	0	0	0	0	100		Perinelli et al. (2017)
Mount Overlord	OVP43	Hb		Ortho-Cumulitic		0	0	40	5	55	0	0	0	100		Perinelli et al. (2017)
Mount Overlord	OVP45	Weh(a)		Meso-cumulitic		43	0	45	0	10	0	2	0	100		Perinelli et al. (2017)
Mount Overlord	OVP46	Cpxte (a)		Meso-cumulitic		5	0	80	0	15	0	0	0	100		Perinelli et al. (2017)
Mount Overlord	OVP50	Cpxte (a)		Mosaic		3	traces	90	2	5	0	0	0	100		Perinelli et al. (2017)
Mount Overlord	OVP55	Weh(a)		Meso-cumulitic		55	0	41	2	1	0	1	0	100		Perinelli et al. (2017)
Mount Overlord	OVP60	Weh		Meso-cumulitic		60	0	39	1	0	0	0	0	100		Perinelli et al. (2017)
Browning Pass	BRP1	Ol-Cpxte		Meso-cumulitic		9.09091	0	80.8081	10.101	0	0	traces	0	100		Perinelli et al. (2011)
Browning Pass	BRP2	Ol-Cpxte		Meso-cumulitic		20	0	70	10	0	0	traces	0	100		Perinelli et al. (2011)
Browning Pass	BRP3	Weh(a)		Meso-cumulitic		70	0	25	traces	traces	0	5	0	100		Perinelli et al. (2011)
Browning Pass	BRP4	Ol-Cpxte		Meso-cumulitic		30	0	70	traces	0	0	traces	0	100		Perinelli et al. (2011)
Browning Pass	BRP5	Weh		Porphyroclastic		45	0	55	traces	0	0	traces	0	100		Perinelli et al. (2011)
Browning Pass	BRP6	Cpxte(a)		Meso-cumulitic		10	0	90	traces	traces	0	traces	0	100		Perinelli et al. (2011)
Browning Pass	BRP7	Cpxte		Meso-cumulitic		3	0	90	7	0	0	traces	0	100		Perinelli et al. (2011)
Browning Pass	BRP8	Ol-Cpxte		Meso-cumulitic		20.202	0	78.7879	1.0101	0	0	traces	0	100		Perinelli et al. (2011)
Browning Pass	BRP9	Cpxte(a)		Meso-cumulitic		10.2041	0	87.7551	2.04082	traces	0	traces	0	100		Perinelli et al. (2011)
Browning Pass	BRP10	Ol-Cpxte		Meso-cumulitic		15	0	85	traces	0	0	traces	0	100		Perinelli et al. (2011)
Browning Pass	BRP12	Ol-Cpxte		Meso-cumulitic		27	0	70	0	0	0	3	0	100		Perinelli et al. (2011)
Browning Pass	BRP13	Ol-Cpxte		Meso-cumulitic		39	0	60	traces	0	0	1	0	100		Perinelli et al. (2011)
Browning Pass	BRP14	Weh		Meso-cumulitic		60	0	40	traces	0	0	traces	0	100		Perinelli et al. (2011)
Browning Pass	BRP16	Ol-Cpxte		Meso-cumulitic		30	0	69	traces	0	0	1	0	100		Perinelli et al. (2011)
Browning Pass	BRP17	Cpxte(a)		Meso-cumulitic		5.15464	0	79.3814	14.433	traces	0	1.03093	0	100		Perinelli et al. (2011)
Browning Pass	BRP18	Weh		Meso-cumulitic		70.7071	0	22.2222	3.0303	0	0	4.0404	0	100		Perinelli et al. (2011)
Browning Pass	BRP19	Weh		Meso-cumulitic		50	0	50	traces	0	0	traces	0	100		Perinelli et al. (2011)
Browning Pass	BRP20	Weh		Meso-cumulitic		60	0	40	traces	0	0	traces	0	100		Perinelli et al. (2011)
Browning Pass	BRP21	Cpxte(a)		Meso-cumulitic		5.05051	0	90.9091	2.0202	traces	0	2.0202	0	100		Perinelli et al. (2011)
Browning Pass	BRP21a	Cpxte		Meso-cumulitic		1	0	84	12	0	0	2	1	100		This study
Browning Pass	BRP21b	Cpxte		Meso-cumulitic		3	0	83	10	traces	0	3	1	100		This study
Browning Pass	BRP21c	Cpxte		Meso-cumulitic		24	0	68	6	0	0	2	0	100		This study
Browning Pass	BRP21e	Cpxte		Meso-cumulitic		0	0	84	15	traces	0	traces	1	100		This study
Browning Pass	BRP22	Cpxte		Ad-cumulitic		5	0	95	traces	0	0	traces	0	100		Perinelli et al. (2011)
Browning Pass	BRP22a	Weh(a)		Meso-cumulitic		49	0	49	1	traces	0	1	0	100		This study
Browning Pass	BRP22b	Weh(a)		Meso-cumulitic		50	0	50	0	0	0	traces	0	100		This study
Browning Pass	BRP22c	Weh		Meso-cumulitic		64	0	34	0	0	0	1	1	100		This study
Browning Pass	BRP23	Cpxte(a)		Meso-cumulitic		7.36842	0	92.6316	traces	traces	0	traces	0	100		Perinelli et al. (2011)

## Sheet: Supplementary Table 2
Supplementary Table 2. Summary of the main chemical features and physical parameters recorded by primary phases inside the northern Victoria Land xenoliths. Equilibrium T (°C) were calculated by means of the Brey & Köhler (1990) thermometer (BKN90); Opx-Cpx, Ol-Sp equilibrium T (°C) and P (GPa) were also obtained by iterative calculations using PTEXL3” spreadsheet (www.mineralogie.uni-frankfurt.d…
Locality	Sample	Rock type		Olivine		Orthopyroxene			Clinopyroxene			Spinel			Amphibole		T (Opx-Cpx; °C)						T (Ol-Sp; °C)			P (GPa)		logfO2 (ΔFMQ)
																	BKN90			Solved iteratively			Solved iteratively			Solved iteratively		Average	St. Dev.
				Fo		Al2O3 (wt%)	Mg#		Al2O3 (wt%)	Mg#		Cr#	Mg#		Mg#		Average	St. Dev.		Average	St. Dev.		Average	St. Dev.
Greene Point	GP9**	Lh		91		2.5-3.8	91-93		3.6-4.2	93		33-35	71-73		-		944.211	21.1976		870.473	28.3684		836.369	30.4661		-		-1.63898	0.13825
Greene Point	GP13	Lh		90-91		4.1-4.3	91		5.9-6.0	92		23-32	75-78		-		1063.13	4.43653		1058.91	7.30179		944.155	37.0951		1		-2.30905	0.275635
Greene Point	GP23**	Hz		92		2.7-2.9	92-93		3.0-3.4	94		45	73-74		-		1066.92	6.97274		990.688	10.83		904.342	33.3679		0.9		-2.54555	0.566292
Greene Point	GP25	Lh		91-92		4.7	91		4.1-6.4	92		18-22	79-82		-		1075.54	13.8942		1037.35	36.5487		900.817	54.1739		1		-2.69714	0.756231
Greene Point	GP28	Lh		91-93		-	-		4.9-5.6	93		28-35	77-79		-		1107.28	65.605		1064.99	53.1355		879.381	52.783		1.5		-2.87635	0.856476
Greene Point	GP30	Lh		92-93		4.1-4.5	92		3.7-5.9	93		26-59	21-83		-		1073.6	23.0242		995.68	73.3434		828.65	7.07806		1		-3.07974	0.220621
Greene Point	GP78**	Hz		92		2.3-2.7	92		2.3-2.6	93-94		-	-		-		1045.97	4.74197		981.707	5.74968		-	-		0.8		-	-
Greene Point	GP81	Hz		92		3.2-3.4	92		4.1-4.4	92-93		39-50	67-72		-		1085.3	77.4539		1041.71	24.1771		919.705	92.8746		1.3		-1.93692	0.821168
Greene Point	GP84	Lh		91-92		3.0-4.5	92		5.3-5.8	92-93		22-36	76-78		-		1123.93	93.5239		1058.93	72.145		891.476	91.8669		1.6		-2.64876	0.308171
Greene Point	CD305	Hz		91-92		4.5-4.7	92		4.0-6.0	92-94		23	79		-		1079.41	26.3588		1000.06	61.7255		890.819	28.5145		1.1		-2.7309	0.331643
Willow Nunatak Beach	143B	Lh		91		3.7	92		3.6	95		37	72		-		933.071	-		951.062	-		998.994	-		0.4		-3.15541	-
Willow Nunatak Beach	278C	Lh(a)		86-87		1.5-2.8	89-90		2.1-4.0	90-92		44-53	47-57		87-90		843.838	57.715		937.355	20.8234		1061.23	34.3385		0.4		-0.189373	0.351371
Baker Rocks	154B	Lh(a)		88-89		3.4-4.2	88-89		4.1-6.7	89-90		19-20	69-72		86-87		994.526	26.4076		989.019	15.8146		883.037	29.9861		-		-2.79179	0.610268
Baker Rocks	154C	Lh(a)		89-90		3.9-4.7	89-90		4.3-7.1	90-91		17-18	75-77		87-90		945.954	67.7722		988.177	33.1123		969.692	121.47		0.8		-2.79573	0.5407
Baker Rocks	154E	Lh		91		2.3-3.1	91-92		2.3-3.1	94-95		29	71-72		-		829.203	129.079		940.047	56.7219		913.461	94.5899		-		-2.75518	1.03794
Baker Rocks	154F	Lh(a)		90		4.3	91		4.7-6.5	91-93		25-34	61-75		88-89		1059.34	81.6843		1041.16	44.3133		873.049	88.6796		-		-1.7542	0.209449
Baker Rocks	154G	Ol-Wb(a) + Hb		86-89		3.6-3.8	82-88		4.4-11.9	84-90		18-28	53-70		77-83		961.033	44.1923		999.168	14.2191		934.518	84.2504		-		-2.06834	0.979586
Baker Rocks	154H	Lh + Hb		88-91		3.0-3.2	89-90		3.9-4.3	90-91		28-45	63-68		86-89		946.658	15.5564		993.45	3.46435		958.309	39.0546		-		-2.3513	0.683008
Baker Rocks	BR1	Lh		89-90		3.4-3.9	90		4.2-5.8	91-92		19-20	74-75		-		889.652	53.8691		955.925	21.26		749.965	20.5425		0.7		-2.68172	0.186449
Baker Rocks	BR4	Lh		88-90		2.9-3.9	89-90		3.8-5.4	90-93		40	67-69		-		973.208	76.7763		1023	50.9441		911.918	39.2506		0.7		-1.79095	0.199358
Baker Rocks	BR5	Lh		90		3.7-4.2	90		4.4-5.0	91-92		18-19	76-77		-		935.356	20.4963		972.998	13.3565		825.017	18.2378		0.7		-2.78564	0.430192
Baker Rocks	BR29	Lh		91		3.0-3.7	91-92		3.9-4.6	92-93		32-34	73		-		995.17	46.0737		999.162	33.6702		1012.43	5.84723		0.8		-2.4688	0.168715
Baker Rocks	BR34	Lh		91		3.6-3.9	91		4.2-4.4	92		20	75		-		913.648	20.2912		986.001	4.37899		1013.11	-		-		-1.67246	-
Baker Rocks	BR36	Lh		88-89		3.6-3.9	89-90		4.6-4.9	90-91		23-24	71-72		-		991.374	17.9042		1015.5	10.9411		1015.31	22.1377		0.8		-2.85416	0.419117
Baker Rocks	BR42	Hz		90-91		3.2-3.9	91-92		4.0-5.6	91-93		30-31	73		-		938.197	26.4473		988.504	14.9523		977.233	24.8435		-		-	-
Baker Rocks	BR43	Hz		91-92		3.4-3.8	92		2.5-4.9	93-94		-	-		-		1023.46	23.5618		1038.97	27.7502		-	-		1.1		-	-
Baker Rocks	BR55	Lh		83		3.9	85		-	-		-	-		-		-	-		-	-		-	-		-		-	-
Baker Rocks	BR56	Lh(a)		82		3.6	83		5.4-5.8	82-84		25	47		-		966.474	49.888		1012.53	9.68982		888.467	-		-		-0.869522	-
Handler Ridge	HR1	Lh		89-90		3.7-5.0	90		5.5-6.5	89-91		11-12	76-77		-		992.041	43.2513		982.954	48.6386		946.734	36.54		1		-1.30536	0.20067
Handler Ridge	HR2	Lh		88-90		3.6-4.7	88-89		3.2-7.0	87-91		16-32	63-71		-		1019.95	37.2507		1024.66	53.5959		919.827	52.0521		0.8		-1.38783	0.117773
Handler Ridge	HR3**	Lh		89-90		3.1-4.3	90		5.3-6.6	91-92		10	77		-		876.68	26.102		817.087	45.8401		924.504	17.3893		-		-1.06503	0.120377
Handler Ridge	HR4	Lh		90		3.4-4.2	90-91		3.7-6.5	89-92		13-25	73-77		-		992.761	33.0439		966.988	42.9623		951.246	83.2253		0.9		-1.54892	0.534787
Handler Ridge	HR5**	Lh		89-91		3.0-4.5	89-90		5.5-6.7	91-92		10-20	76-78		-		838.8	19.3369		789.724	41.2142		893.665	29.3452		-		-1.29134	0.273117
Handler Ridge	HR6	Lh		90-91		2.9-3.6	90-91		4.3-7.3	89-91		33-34	69		-		1066.59	26.1075		1066.11	21.6383		951.478	28.0466		0.9		-2.07971	0.183512
Handler Ridge	HR7	Weh		85		-	-		4.0-4.9	86-88		18	60		-		-	-		979.506	8.16735		719.791	12.0865		-		1.31285	0.0614542
Handler Ridge	HR9	Lh		89-90		3.2-4.1	90-91		4.6-6.7	86-92		10	77-81		-		905.025	44.8961		820.603	49.6849		982.428	98.9551		-		-1.067	0.301484
Handler Ridge	HR10A	Lh		88		3.5-4.4	88-89		3.4-6.2	87-90		20-21	67-68		-		1027.13	29.488		954.424	63.8187		886.848	24.0398		0.9		-1.41257	0.168681
Handler Ridge	HR10	Lh		88		3.1-4.3	88-89		4.5-6.5	87-88		21	68-69		-		1042.85	19.8597		1028.05	50.5875		922.24	24.0256		0.9		-1.32397	0.128624
Handler Ridge	HR11	Weh		85		-	-		4.3-4.8	86-89		25-32	54-58		-		-	-		968.102	7.80725		780.618	12.8664		-		1.35893	0.0469754
Handler Ridge	HR13**	Lh		89		3.8	89-90		4.2-4.3	91		21	72-73		-		966.523	7.39867		924.604	9.5066		912.758	21.6948		0.7		-1.96208	0.0659747
Harrow Peaks	HP121	Dn(a) + Hb		90-91		1.3-2.7	89-90		1.6-2.1	92-93		31-42	57-70		90-91		-	-		934.004	46.8532		870.147	53.5591		0.3		-2.26512	0.705967
Harrow Peaks	HP124	Dn(a)		88-89		-	-		0.7-7.3	90-94		37-60	49-59		87-89		-	-		896.925	7.21209		906.534	46.4771		0.5		-0.249589	0.48664
Harrow Peaks	HP143	Dn(a) + Cpxte		87-88		2.4-3.0	89		1.3-5.7	89-93		39-48	55-61		88-89		-	-		981.06	44.1624		969.31	29.3399		0.8		-0.834562	0.357137
Harrow Peaks	HP144	Hz(a) + Opxte(a)		86-91		0.3-2.2	88-90		0.5-2.8	92-94		61-74	57-63		-		-	-		951.023	80.2053		1150.14	73.4653		0.6		-1.10662	0.448827
Harrow Peaks	HP151	Lh		87-88		0.7-3.3	87-89		0.6-4.9	90-93		22-50	64-71		-		-	-		926.4	62.051		1056.69	100.962		0.6		-1.99029	0.39859
Harrow Peaks	HP163	Opxte		80-84		1.6-2.8	83-85		1.9-4.0	85-89		35-53	34-49		-		-	-		892.986	49.1767		790.215	76.2508		0.4		0.180014	0.717794
Harrow Peaks	HP164	Lh(a)		79-86		2.2-3.0	88-89		4.8-5.3	87-88		25-36	63-69		83		-	-		958.76	5.87573		926.655	53.5148		0.2		-2.2433	0.541381
Harrow Peaks	HP166	Hz		88-89		2.0-2.4	88-89		3.3-3.6	90-91		-	-		-		-	-		907.403	57.3779		974.593	55.8982		0.3		-1.43615	0.335442
Mount Overlord	OVP1	Hb		75		-	-		9.6-10.2	75		-	16-48		69-71		-	-		1042.08	78.5949		768.935	78.5949		-		-	-
Mount Overlord	OVP4	Weh(a)		-		-	-		9.5	76		1	31-54		-		-	-		1105.95	58.8495		832.798	58.8495		-		-	-
Mount Overlord	OVP7	Hb		75		-	-		10.7-10.8	74-75		-	-		69-70		-	-		991.007	58.5206		717.857	58.5206		-		-	-
Mount Overlord	OVP19	Weh		82		-	-		6.6	82		-	-		-		-	-		-	-		1068.3	25.0089		-		-0.0549081	0.301899
Mount Overlord	OVP25	Ol-Cpxte(a)		82		4.6-5.6	77-83		7.5	82		5	59		76		-	-		1029	38.0297		1079.72	57.8138		0.8		-	-
Mount Overlord	OVP27	Weh(a)		80		-	-		-	-		-	-		-		-	-		-	-		887.744	2.47611		-		0.761749	0.0557673
Mount Overlord	OVP28	Weh		80		-	-		8.9	80		4-10	54-61		-		-	-		-	-		943.858	17.6963		-		0.0350717	0.216199
Mount Overlord	OVP30	Weh		80-81		-	-		8.9	80		-	-		-		-	-		-	-		-	-		-		-	-
Mount Overlord	OVP39	Weh(a)		77		-	-		8.1	79		4	51		-		-	-		-	-		896.257	19.8076		-		0.621938	0.0437316
Mount Overlord	OVP43	Hb		-		-	-		8.2	73		9-10	11-16		63-65		-	-		-	-		-	-		-		-	-
Mount Overlord	OVP46	Cpxte(a)		78		-	-		9.8-11.0	75-78		12	18-43		69-71		-	-		-	-		-	-		-		-	-
Mount Overlord	OVP50	Cpxte(a)		80		5.9-6.5	76		8	79		-	-		-		-	-		1099.18	36.6255		1224.2	97.3006		1.5		-	-
Mount Overlord	OVP55	Weh(a)		82-88		-	-		5.8-13.5	78-80		10-30	48-65		75-77		-	-		-	-		1227.76	60.9568		-		-0.220183	0.554753
Mount Overlord	OVP60	Weh		83		-	-		5.8	84		-	-		-		-	-		-	-		-	-		-		-	-
Browning Pass	BRP1	Ol-Cpxte		74-76		-	-		8.9-9.9	73		1	51		-		-	-		972.237	47.0035		848.722	4.67905		-		0.590703	0.244016
Browning Pass	BRP3	Weh(a)		84		-	-		5.0-6.1	77-83		1	52		-		-	-		1117.24	43.451		-	-		-		-	-
Browning Pass	BRP7	Cpxte		73		-	-		7.2-8.7	74-75		1	48-52		-		-	-		943.943	33.8729		844.076			-		0.419132	-
Browning Pass	BRP8	Ol-Cpxte		76		-	-		5.5-7.3	78-80		1-3	21-49		-		-	-		1049	36.9806		901.873	41.4233		-		0.881818	0.0991984
Browning Pass	BRP12	Ol-Cpxte		72-80		-	-		5.8-7.8	77-81		-	-		-		-	-		975.645	22.0386		-	-		-		-	-
Browning Pass	BRP19	Weh		83		-	-		4.4	82		42-43	42-43		-		-	-		1169.67	11.3109		1110.52	36.5155		-		0.562758	0.108806
Browning Pass	BRP20	Weh		83		-	-		4.7	82		-	-		-		-	-		1137.22	14.323		-	-		-		-	-
Browning Pass	BRP21	Cpxte(a)		75-81		-	-		8.4-9.0	72-76		4-17	18-42		69-71		-	-		930.395	36.4337		745.557	8.68604		-		1.25008	0.00133577
Browning Pass	BRP22	Cpxte		75		-	-		6.6	78		17-30	20-33		71-72		-	-		1018.45	16.7897		953.9	19.8335		-		1.48665	0.0825624

## Sheet: Supplementary Table 3
Supplementary Table 3. Trace element content of representative clinopyroxene crystals from northern Victoria Land ultramafic xenoliths. Hz = harzburgite; Lh = lherzolite; Weh = wehrlite; Wb = websterite; Opxte = orthopyroxenite; Hb = hornblendite. (a) = contains amphibole; bdl = below detection limit; n.d. = not determined. See Supplementary Table 1 for corresponding references.
Locality	Greene Point																	Baker Rocks															Handler Ridge					Harrow Peaks									Browning Pass		Mount Overlord
Sample	GP81	GP81	GP81	GP81	GP23	GP23	GP30	GP30	GP30	GP25	GP25	GP25	GP25	GP84	GP84	GP13		BR42	BR43	BR43	154H	154H	154E	BR29	BR29	BR29	BR29	BR29	154G	154G	154G		HR2	HR4	HR4	HR11		HP144	HP166	HP166	HP163	HP163	HP163	HP163	HP163		BRP3		OVP1
Rock type	Hz	Hz	Hz	Hz	Hz	Hz	Lh	Lh	Lh	Lh	Lh	Lh	Lh	Lh	Lh	Lh		Hz	Hz	Hz	Lh(a)	Lh(a)	Lh	Lh	Lh	Lh	Lh	Lh	Ol-wb(a)	Ol-wb(a)	Ol-wb(a)		Lh	Lh	Lh	Weh		Hz + Opxte	Hz	Hz	Opxte	Opxte	Opxte	Opxte	Opxte		Weh(a)		Hb
Cs (ppm)	<0.0105	<0.0088	<0.0036	<0.0076	bdl	<0.0141	<0.0120	0.0216	<0.181	<0.0071	0.0063	<0.0075	<0.0077	<0.0130	<0.0104	0.007		0.0073	<0.0111	<0.0074	bdl	bdl	bdl	<0.0049	<0.0096	<0.0091	0.0083	<0.0054	bdl	<0.0057	<0.0083		0.007	0.012	0.004	0.0063		0.0503	bdl	bdl	0.0191	0.0254	0.0334	0.0085	0.0231		n.d.		n.d.
Rb	0.038	0.039	0.022	0.019	8.72	<0.047	0.052	<0.027	<0.045	0.086	0.051	0.058	0.051	0.033	<0.034	0.013		<0.042	0.068	0.207	<0.077	0.281	bdl	0.076	<0.049	0.162	<0.042	<0.030	bdl	<0.045	0.105		0.013	0.263	0.106	0.0124		23.81	0.121	0.046	0.06	0.048	0.181	0.192	0.062		n.d.		n.d.
Ba	0.303	0.399	0.153	0.289	96.44	<0.17	<0.050	0.154	1.08	0.1	0.196	0.175	0.148	0.354	0.095	0.127		0.032	<0.036	0.049	bdl	bdl	bdl	0.18	<0.029	1.49	0.04	0.038	bdl	<0.026	0.044		0.13	9.93	2.2	0.0446		31.47	0.104	0.147	0.32	0.27	0.706	0.716	0.331		n.d.		n.d.
Th	0.035	<0.00	0.0276	0.0247	1.57	0.061	<0.0181	<0.0142	<0.022	0.0074	0.00295	0.0051	<0.0040	<0.0178	0.039	0.005		0.1404	0.0112	0.021	0.205	1.13	2.81	0.501	0.679	0.678	0.242	0.54	0.1468	0.0827	0.662		0.135	0.051	0.114	0.0107		0.381	0.072	0.065	0.071	0.023	0.354	0.298	0.196		n.d.		n.d.
U	<0.0067	0.0099	<0.00	<0.00	0.53	0.052	0.0115	bdl	<0.00	<0.0020	<0.00	<0.00202	<0.00	0.0164	<0.0092	0.001		0.0464	<0.0042	0.0025	0.009	0.412	0.467	0.17	0.166	0.192	0.0656	0.1468	0.0432	0.0408	0.188		0.027	0.026	0.048	0.00239		0.231	bdl	0.0394	0.021	0.047	0.126	0.092	0.154		n.d.		n.d.
Nb	0.276	0.246	0.168	0.184	1.88	0.193	<0.058	0.189	0.185	0.0847	0.0468	0.0427	0.06	0.255	0.401	0.093		0.575	0.068	0.252	2.172	0.812	5.44	0.271	0.105	0.234	1.344	0.417	0.573	0.164	0.359		1.24	0.79	0.218	0.0891		1.712	0.287	0.261	0.019	0.0242	0.329	0.292	0.146		n.d.		n.d.
Ta	<0.00	0.021	0.0057	0.0151	bdl	0.0165	0.0069	<0.0094	0.0224	<0.0021	0.0038	0.0031	0.0061	0.0259	0.0533	0.015		0.205	0.007	<0.0043	0.335	0.127	0.433	0.0074	0.0199	0.0162	0.0362	0.0534	0.0814	0.0316	0.0956		0.22	0.06	0.001	0.017		0.0577	0.098	0.076	bdl	bdl	bdl	bdl	bdl		n.d.		n.d.
La	0.458	0.469	0.305	0.491	4	0.837	1.189	0.892	1.336	0.383	0.379	0.315	0.371	0.941	1.007	0.984		5.77	0.541	0.531	9.21	10.51	38.83	1.407	2.98	3.8	0.587	1.196	1.406	1.519	6.24		8.23	0.983	0.277	2.114		6.32	4.6	5.63	1.028	1.116	3.63	3.65	2.38		1.79		12.2
Ce	2.33	2.35	1.635	2.19	6.78	2.78	4.28	3.96	5.12	1.393	1.3	1.262	1.445	2.154	2.56	4.38		20.94	2.165	2.444	37.01	29.58	75.38	1.706	4.23	6.13	0.57	1.053	2.85	3.11	16.19		27.7	2.93	0.727	9.43		17.81	16.93	19.39	5.02	5.23	10.03	10.79	6.75		6.83		41
Pr	0.464	0.493	0.332	0.435	0.68	0.49	0.781	0.755	0.965	0.267	0.245	0.26	0.28	0.275	0.284	0.823		3.6	0.455	0.45	7.38	3.51	8.03	0.0957	0.316	0.514	0.0319	0.0483	0.2395	0.268	2.313		4.63	0.573	0.22	1.875		2.605	3.26	3.41	1.21	1.238	1.739	1.83	1.253		n.d.		n.d.
Sr	30.82	30.81	22.27	32.92	27.14	29.43	83.07	75.51	89.81	25.07	25.07	23.8	25.77	19.7	23.12	74.98		78.41	38.06	38.63	137.5	146.16	84.7	44.62	83.29	94.69	13.07	31.5	29.7	21.55	88.95		119	169	21.1	48.03		52.02	88.43	100.71	18.13	17.93	25.1	25.72	13.93		56.8		108
Nd	2.6	2.2	1.85	2.13	2.17	2.26	5.11	5.28	4.73	1.831	1.781	1.652	1.76	1.12	1.02	4.733		19.64	2.84	2.89	36.45	11.14	22	0.336	0.837	1.446	0.105	0.171	0.892	1.116	11.15		23.6	3.59	1.93	10.9		11.8	20.84	21.77	8.91	9.26	11.22	11.01	8		6.83		33.7
Zr	11.27	10.5	8.46	9.14	bdl	4.52	19.84	18.11	20.24	7.28	7.88	6.83	7.68	2.59	3.01	35.633		88.78	12.36	13.52	144.67	67.74	108.51	0.603	2.31	5.27	0.462	0.504	3.03	3.13	71.43		82.1	21.4	12	28.86		8.49	155.93	159.94	25.93	27.2	28.31	29.57	29.37		27		182
Hf	0.389	0.376	0.288	0.314	bdl	0.127	0.729	0.562	0.66	0.331	0.342	0.242	0.262	0.071	0.102	0.858		2.87	0.514	0.496	7.2	1.077	3.58	<0.025	0.147	0.096	0.061	0.099	0.083	0.071	1.521		3.18	0.83	0.551	1.112		0.241	5.14	6.14	1.13	1.251	1.204	1.46	1.223		n.d.		n.d.
Sm	0.87	0.72	0.66	0.778	0.46	0.57	1.64	1.75	2	0.888	0.893	0.772	0.773	0.21	0.23	1.501		5.41	1.089	1.045	12.13	2.54	5.23	0.218	0.257	0.468	0.16	0.162	0.395	0.45	2.7		6.46	1.57	1.19	3.02		3.23	8.08	7.5	3.7	3.31	4.06	3.97	3.04		2.45		9.18
Eu	0.367	0.307	0.23	0.319	0.117	0.144	0.688	0.854	0.859	0.397	0.388	0.393	0.351	0.068	0.055	0.575		1.938	0.434	0.471	3.5	0.823	1.334	0.142	0.14	0.193	0.11	0.1037	0.187	0.198	0.88		1.9	0.742	0.492	1.105		0.98	2.35	2.41	1.221	1.087	1.062	1.001	0.835		0.76		2.81
Gd	1.15	1.01	0.74	1.025	0.32	0.42	2.36	2.33	2.21	1.48	1.56	1.308	1.44	0.24	0.22	1.831		5.05	1.335	1.672	12.29	2.13	3.59	0.646	0.613	0.692	0.524	0.557	0.715	0.86	2.6		6.03	2.75	2.14	3.22		3.03	9.64	9.5	4.25	3.88	4.81	4.12	3.77		2.6		8.47
Tb	0.18	0.17	0.118	0.145	0.05	0.065	0.44	0.381	0.374	0.304	0.329	0.294	0.295	0.1	0.085	0.328		0.792	0.266	0.297	1.654	0.34	0.45	0.142	0.146	0.16	0.1192	0.1383	0.1478	0.17	0.452		0.874	0.54	0.412	0.464		0.484	1.542	1.596	0.77	0.789	0.757	0.702	0.64		n.d.		n.d.
Dy	0.981	0.967	0.723	0.94	0.42	0.58	2.61	2.57	2.23	2.13	2.18	2.26	2.18	0.83	0.694	2.32		4.47	1.825	1.81	8.43	2.084	2.23	1.355	1.242	1.084	1.061	1.187	1.19	1.34	2.37		5.49	4.01	3.13	2.92		3.17	9.18	9.37	4.08	4.09	3.9	4.36	3.83		2.12		6.67
Y	5.26	4.99	3.72	4.52	4.26	3.15	13.1	12.02	13.96	12.29	12.26	12.03	12.72	4.44	4.7	12.673		19.49	9.9	10.25	37.23	10.65	12.12	7.9	7.85	6.69	6.81	7.16	7.68	8.04	12.18		24.6	23.7	18.2	13.6		16.86	43.61	45.44	17.77	19.41	19.46	19.57	18.63		10.2		31
Ho	0.17	0.18	0.157	0.167	0.11	0.151	0.504	0.532	0.532	0.468	0.472	0.442	0.47	0.204	0.19	0.473		0.823	0.392	0.39	1.374	0.398	0.45475	0.328	0.295	0.27	0.26	0.301	0.311	0.34	0.494		1.024	0.956	0.7	0.543		0.633	1.987	1.902	0.772	0.754	0.802	0.82	0.762		n.d.		n.d.
Er	0.5	0.509	0.44	0.45	0.39	0.49	1.41	1.32	1.32	1.307	1.301	1.39	1.447	0.629	0.542	1.379		2.08	1.118	1.19	3.5	1	1.151	0.869	0.846	0.898	0.86	0.885	0.993	0.96	1.243		2.84	2.46	1.98	1.374		1.753	4.19	4.37	1.9	1.94	2.02	2	1.8		0.98		2.99
Tm	0.076	0.07	0.07	0.0627	0.065	0.07	0.203	0.19	0.19	0.21	0.21	0.22	0.23	0.11	0.09	0.204		0.29	0.163	0.158	0.466	0.14	0.1802	0.1251	0.14	0.141	0.1187	0.141	0.156	0.15	0.189		0.357	0.386	0.301	0.1826		0.253	0.541	0.499	0.207	0.233	0.263	0.244	0.23		n.d.		n.d.
Yb	0.37	0.381	0.41	0.43	0.42	0.47	1.09	1.12	1.12	1.37	1.345	1.324	1.46	0.72	0.67	1.279		1.567	1.027	1.01	2.58	0.83	1.182	0.921	0.841	1.142	0.87	0.907	0.99	1.067	1.25		2.3	2.84	2.03	1.113		1.67	3.29	3.27	1.21	1.47	1.5	1.61	1.5		0.69		1.88
Lu	0.05	0.05	0.06	0.059	0.07	0.068	0.133	0.128	0.128	0.188	0.199	0.177	0.2	0.1	0.1	0.184		0.207	0.163	0.14	0.33	0.1124	0.182	0.14	0.14	0.16	0.13	0.15	0.14	0.143	0.161		0.306	0.427	0.284	0.1512		0.243	0.403	0.441	0.143	0.195	0.18	0.174	0.182		n.d.		n.d.

## Sheet: Supplementary Table 4
Supplementary Table 4. Whole-rock major and trace element analyses of representative ultramafic xenoliths from northern Victoria Land and corresponding references. Hz = harzburgite; Lh = lherzolite; Weh = wehrlite; Wb = websterite; Cpxte = clinopyroxenite. (a) = contains amphibole.
Locality	Greene Point							Willow Nunatak Beach										Willow Nunatak			Edmondson Point		Baker Rocks							Baker Rocks				Mount Overlord							Browning Pass
Sample	GP5P	GP6P	GP10P	GP14P	GP21P	GP22P		142A	142B	143A	143B	278A	278B	278C	278D	278E		265A	265C		231A		154B	154C	154E	154F	154H Lh	161B		BR213	BR218 Lh	BR219 Hz		OVP19	OVP25	OVP27	OVP28	OVP50	OVP60		BRP3	BRP5	BRP14	BRP16	BRP23
Rock type	Hz	Hz	Hz	Lh	Hz	Hz		Lh	Lh	Lh	Lh	Hz	Hz	Lh(a)	Lh(a)	Lh		Ol-Wb	Lh		Hz		Lh(a)	Lh(a)	Lh	Lh(a)	Lh(a)	Hz		Lh	Lh	Hz		Weh	Ol-Cpxte(a)	Weh(a)	Weh	Cpxte (a)	Weh		Weh(a)	Weh	Weh	Ol-Cpxte	Cpxte(a)
SiO2 (wt%)	42.19	42.6	42.09	44.59	41.84	43.46		45.84	45.25	44.36	44.58	41.92	43.96	41.26	40.97	43.92		49.78	45.57		42.41		43.72	42.61	45.41	42.25	41.5	43.38		44.14	43.99	40.25		42.12	45.03	39.11	42.09	48.78	43.26		43.31	43.84	42.01	42.98	43.29
TiO2	0.06	0.05	0.04	0.1	0.21	0.14		0.04	0.03	0.02	0.03	0.01	0.02	0.07	0.06	0.05		0.12	0.04		0.01		0.05	0.15	0.02	0.31	0.07	0.08		0.08	0.04	0.2		0.3	0.6	0.57	0.61	0.84	0.4		0.26	0.73	0.78	1.4	1.83
Al2O3	1.02	0.9	0.92	2.95	1.38	1.15		1.88	1.77	1.47	2.13	0.45	0.86	0.99	0.84	1.61		2.57	1.3		0.55		1.59	1.82	1.84	2.47	1.01	1.25		1.85	2.1	1.73		2.48	4.38	4	3.58	7.05	2.88		1.63	4.47	3.82	5.8	7.14
FeOT	8.59	7.75	7.86	7.15	7.88	7.7		7.09	7.23	7.48	7.29	8.61	7.44	12.01	12.85	8.65		6.31	7.05		7.82		9.56	9.78	7.32	11.49	10.61	8.18		7.7	9.76	11.66		13.71	11.76	17.51	14.66	9.05	12.73		11.88	11.92	12.26	13.64	12.19
MnO	0.14	0.14	0.13	0.13	0.14	0.14		0.12	0.12	0.12	0.12	0.12	0.12	0.2	0.21	0.13		0.12	0.12		0.12		0.14	0.15	0.12	0.16	0.15	0.13		0.12	0.16	0.18		0.2	0.19	0.23	0.21	0.19	0.2		0.12	0.18	0.21	0.2	0.18
MgO	44.42	45.1	46.48	41.22	44.62	43.96		42.65	43.62	45.24	43.92	48.52	46.56	43.17	43.02	43.48		34.43	44.02		48.63		42.7	43.42	42.79	40.13	45.26	45.73		43.5	41.26	42.95		34.69	24.64	32.45	28.8	15.98	31.45		36.18	27.95	28.37	20.76	17.56
CaO	0.82	0.83	0.78	2.51	1.3	0.89		2.16	1.82	1.01	1.04	0.36	0.91	2.13	1.84	2.12		6.46	1.76		0.33		2.12	1.83	2.35	2.77	1.27	1.05		0.98	1.87	1.33		5.23	11.8	4.98	8.67	15.67	7.79		5.64	9.58	9.04	13.51	16.01
Na2O	0.19	0.1	0.21	0.33	0.38	0.26		0.14	0.1	0.2	0.62	0	0.12	0.09	0.14	0.01		0.13	0.12		0.09		0.09	0.18	0.1	0.27	0.07	0.13		0.17	0.11	0.18		0.31	0.54	0.21	0.39	0.96	0.41		0.14	0.44	0.39	0.58	0.64
K2O	0.09	0.07	0.07	0.1	0.14	0.13		0.07	0.05	0.1	0.26	0.01	0.01	0.03	0.03	0.01		0.03	0.01		0.04		0.01	0.03	0.03	0.06	0.03	0.06		0.04	0.03	0.07		0.03	0.03	0.01	0.01	0.11	0.01		0.01	0.05	0.04	0.04	0.03
P2O5	0.05	0.04	0.05	0.03	0.08	0.1		0.02	0.01	0.01	0.02	0	0.01	0.05	0.03	0.02		0.06	0.01		0		0.03	0.04	0.02	0.09	0.04	0.02		0.02	0.02	0.03		0.02	0.01	0.01	0.02	0.02	0.02		0.02	0.03	0.04	0.03	0.02
Tot.	97.57	97.58	98.63	99.11	97.97	97.93		100.01	100	100.01	100.01	100	100.01	100	99.99	100		100.01	100		100		100.01	100.01	100	100	100.01	100.01		98.6	99.34	98.58		99.09	98.98	99.08	99.04	98.65	99.15		99.19	99.19	96.96	98.94	98.89
LOI	0.27	0.26	0.46	n.d.	0.2	0.38		n.d.	n.d.	n.d.	n.d.	n.d.	n.d.	n.d.	n.d.	n.d.		n.d.	n.d.		n.d.		n.d.	n.d.	n.d.	n.d.	n.d.	n.d.		0.87	n.d.	0.17		0.82	0.71	0.54	0.69	0.29	0.7		0.65	0.62	0.84	0.66	0.62
Mg#	90.2104	91.205	91.3328	91.1294	90.9832	91.0503		91.4673	91.4902	91.5094	91.4792	90.9437	91.7708	86.4963	85.6443	89.9572		90.6745	91.7537		91.723		88.8384	88.7785	91.241	86.1569	88.3743	90.8777		90.9642	88.2812	86.7795		81.8476	78.8749	76.7574	77.7816	75.8836	81.49		84.4406	80.6891	80.4824	73.0617	71.9653
V (ppm)	34	30	26	62	37	31		75	69	44	43	24	41	36	33	62		99.7	50		26		64	56	73	76	33	48		45	76	56		96	213	151	149	209	121		133	192	155	265	347
Cr	2611	2715	2666	2883	3184	2601		3490	3480	2870	2820	2020	2650	2630	2530	2920		5620	2440		3730		2530	2680	4100	2870	1870	2540		2975	2395	3096		2143	2743	2274	1986	1140	3759		1678	1719	1599	1169	502
Co	118.8	112.2	118.9	111	108	115.9		101	106	111	111	129	114	112	113	115		87	111		124		110	114	105	113	121	118		109.2	104	115		116	86	134	107	65	105		102	98	112	88	79
Ni	1983	2006	2130	1849	1998	2051		2080	2170	2350	2320	2540	2410	2060	2040	2100		1530	2290		2590		2130	2220	2090	2030	2300	2310		1926	1813	2011		1280	849	1207	875	423	1248		1714	1051	751	461	393
Rb	3.11	3.32	3.26	1.3	3.18	3.4		1	n.d.	2	5	n.d.	n.d.	1	1	n.d.		2	n.d.		2		n.d.	n.d.	n.d.	1	2	3		2.26	1.95	2.68		3	4	5	4	7	4		4	5	4	6	5
Sr	38.59	37.47	33.69	11.1	80.51	66.85		5	3	3	6	n.d.	2	28	21	6		26	10		8		13	26	4	48	21	20		18.92	15.1	29.29		39	48	35	46	92	58		48	49	56	73	78
Y	1.5	0.8	1.01	1.34	1.6	1.5		1.4	1	1	2	n.d.	1	3	2	2		2.7	1		1		2	2.9	2	4.6	2	2		1.2	2.66	2.1		7	8	9	6	12	10		10	14	13	19	26
Zr	5.58	5.14	6.05	5.7	6.92	4.23		n.d.	n.d.	n.d.	33	n.d.	n.d.	9	14	n.d.		10	n.d.		n.d.		n.d.	13	n.d.	34	n.d.	n.d.		6.08	6	8.14		16	28	18	26	24	17		18	29	37	54	61
Nb	1.4	2.33	2.4	0.17	3.4	2.52		1	n.d.	1	6	n.d.	n.d.	n.d.	n.d.	n.d.		1	n.d.		1		n.d.	2	1	4	1	2		1.77	1.23	2.65		3.5	4.1	1.97	3.98	3.7	2.35
Cs	0.08	0.06	0.06	0.36	0.13	0.09																								0.04	0.33	0.12		0.1	0.05	0.08	0.097	0.09	0.083
Ba	23.93	15.99	21.14	0.68	48.11	39.36		11	6	11	21	12	11	12	4	16		13	12		8		6	15	8	23	12	15		13.18	7.1	20.14		13	10	7	7	15.3	6		8	16	17	10	11
La	3.24	1.68	2.96	0.79	3.05	3.44		0.8	n.d.	n.d.	3.9	n.d.	n.d.	n.d.	n.d.	n.d.		1.7	n.d.		n.d.		n.d.	2.2	n.d.	3.8	n.d.	n.d.		1.33	0.79	2.22		3	4	2	3	3.12	3		3	1	1	2	2
Ce	6.49	3.19	3.69	1.84	4.52	3.85		2.1	4	n.d.	9.3	n.d.	n.d.	10	10	n.d.		4.5	n.d.		n.d.		4	5.8	n.d.	8.7	n.d.	4		2.64	1.93	4.73		7	13	6	8	9.15	10		10	12	7	20	23
Pr	0.554	0.28	0.382	0.25	0.325	0.331																								0.253	0.21	0.458		1.06	1.43	1.13	0.99	1.71	1.52
Nd	2.21	1.1	1.89	0.97	1.91	1.65																								1.09	0.88	2.16		5.4	5.12	5.6	4.81	9.88	4.95
Sm	0.46	0.23	0.38	0.17	0.37	0.38																								0.27	0.24	0.47		1.5	1.3	1.4	1.4	2.89	1.21
Eu	0.138	0.069	0.115	0.06	0.183	0.145																								0.08	0.09	0.179		0.52	0.43	0.41	0.39	1.06	0.42
Gd	0.32	0.15	0.31	0.18	0.33	0.37																								0.21	0.35	0.46		1.64	1.23	1.56	0.96	3.71	1.33
Tb	0.05	0.02	0.04	0.03	0.06	0.08																								0.03	0.06	0.06		0.27	0.24	0.25	0.16	0.52	0.19
Dy	0.25	0.13	0.23	0.21	0.31	0.38																								0.21	0.45	0.36		1.2	1.31	1.48	0.85	2.91	1.12
Ho	0.05	0.03	0.04	0.04	0.08	0.07																								0.04	0.1	0.07		0.26	0.28	0.26	0.17	0.53	0.2
Er	0.15	0.08	0.14	0.15	0.17	0.21																								0.12	0.28	0.2		0.65	0.77	0.8	0.47	1.24	0.65
Tm	0.018	0.011	0.022	0.02	0.038	0.029																								0.023	0.04	0.024		0.1	0.099	0.122	0.06	0.17	0.09
Yb	0.11	0.08	0.09	0.12	0.12	0.12																								0.15	0.18	0.16		0.44	0.49	0.8	0.38	0.97	0.51
Lu	0.021	0.012	0.019	0.03	0.018	0.029																								0.025	0.04	0.024		0.089	0.098	0.13	0.09	0.13	0.088
Hf	0.16	0.14	0.17	0.11	0.18	0.12																								0.24	0.16	0.22		0.99	1.15	0.98	1.05	0.8	0.66
Ta	0.279	0.147	0.238	0.05	0.211	0.25																								0.12	0.26	0.195		0.41	0.38	0.46	0.35	0.3	0.28
Th	0.411	0.183	0.53	0.05	0.934	0.705		n.d.	n.d.	n.d.	2	n.d.	n.d.	n.d.	n.d.	n.d.		n.d.	n.d.		n.d.		n.d.	n.d.	n.d.	1	n.d.	n.d.		0.179	0.13	0.408		0.41	0.39	0.59	0.33	0.25	0.52
U	0.134	0.079	0.199	0.02	0.214	0.182																								0.055	0.02	0.092		0.13	0.11	0.104	0.123	0.09	0.101
Reference	Perinelli et al. (2006)							Beccaluva et al. (1991)																						Perinelli et al. (2006)				Perinelli et al. (2017)							Perinelli et al. (2011)

## Sheet: Supplementary Table 5
Supplementary Table 5. Summary of the partial melting degree (F%) recorded by primary phases inside lherzolitic and harzburgitic xenoliths from Greene Point, Willow Nunatak Beach, Baker Rocks and Handler Ridge. Partial melting degrees recorded by Opx and Cpx major elements were calculated on their Al2O3 (wt%) and MgO (wt%) contents, by means of the melting models of Bonadiman & Coltorti (2011) an…
LOCALITY	SAMPLE	Rock type		F (%) Opx major elements			F (%) Cpx major elements			F (%) Cpx trace elements			F (%) Ol-Sp major elements
				Min	Max		Min	Max		Min	Max		Min	Max
Greene Point	GP9	Lh		16	24		17	19		10	14		15	20
Greene Point	GP13	Lh		12	14		11	13		7	7		5	10
Greene Point	GP23	Hz		30	32		24	25		16	17		25	30
Greene Point	GP25	Lh		18	22		15	23		6	10		15	20
Greene Point	GP28	Lh		-	-		20	21		10	10		20	25
Greene Point	GP30	Lh		24	27		16	18		5	8		20	25
Greene Point	GP78	Hz		29	33		-	-		23	23		-	-
Greene Point	GP81	Hz		25	29		20	23		14	18		25	30
Greene Point	GP84	Lh		21	23		19	21		15	15		20	25
Greene Point	CD305	Hz		23	24		17	23		-	-		20	25
Willow Nunatak Beach	143B	Lh		26	26		19	19		-	-		15	20
Willow Nunatak Beach	278C	Lh(a)		18	29		18	23		-	-		-	-
Baker Rocks	154B	Lh(a)		12	16		8	17		6	6		0	5
Baker Rocks	154C	Lh(a)		10	14		4	17		9	13		5	10
Baker Rocks	154E	Lh		17	31		21	25		7	18		15	20
Baker Rocks	154F	Lh(a)		17	17		11	25		-	-		5	10
Baker Rocks	154H	Lh		17	24		17	18		7	9		-	-
Baker Rocks	BR1	Lh		14	16		13	17		-	-		5	10
Baker Rocks	BR4	Lh		14	18		14	18		-	-		-	-
Baker Rocks	BR5	Lh		12	15		15	17		-	-		5	10
Baker Rocks	BR29	Lh		15	19		16	18		11	13		15	20
Baker Rocks	BR34	Lh		22	25		17	18		-	-		10	15
Baker Rocks	BR36	Lh		14	15		15	17		7	11		0	5
Baker Rocks	BR42	Hz		16	23		13	18		1	10		10	15
Baker Rocks	BR43	Hz		17	24		16	24		7	10		-	-
Handler Ridge	HR1	Lh		8	23		9	15		1	4		0	5
Handler Ridge	HR2	Lh		10	15		10	21		0	3		0	5
Handler Ridge	HR3	Lh		13	18		8	15		-	-		0	5
Handler Ridge	HR4	Lh		14	18		7	18		0	3		5	10
Handler Ridge	HR5	Lh		11	19		5	14		-	-		10	15
Handler Ridge	HR6	Lh		15	19		12	17		-	-		10	20
Handler Ridge	HR9	Lh		13	17		5	16		-	-		0	5
Handler Ridge	HR10A	Lh		12	16		10	19		-	-		0	5
Handler Ridge	HR10	Lh		12	18		10	17		-	-		0	5
Handler Ridge	HR13	Lh		14	14		17	17		-	-		0	5
